# Supplementary material for: Experimental observation of near-wall effects during the puncture of soft solids
Source: Royal Society of Chemistry journal article supplement (doi:10.1039/d3sm01216f), 2024-01-01
Supplement: d3sm01216f1.pdf [file d3sm01216f1.pdf]

Cite this: DOI: 10.1039/xxxxxxxxxx

## SI: Experimental Observation of Near-Wall Effects During the Puncture of Soft Solids

Christopher W. Barney,<sup>a,b,c</sup> Szabolcs Berezvai,<sup>d</sup> Allison L. Chau,<sup>e</sup> Younghoon Kwon,<sup>b</sup> Angela A. Pitenis,<sup>e</sup> Robert M. McMeeking,<sup>b,e</sup> Megan T. Valentine,<sup>b\*</sup> and Matthew E. Helgeson<sup>a\*</sup>

Received Date  
Accepted Date

DOI: 10.1039/xxxxxxxxxx

www.rsc.org/journalname

### 1 Deep Indentation and Puncture

Summary data for the trials with variable sample height are contained in Table S1. Summary data for the variable velocity trials are contained in Table S2. An enlarged version of Figure 1 from the main text is shown in Figure S1. Expanded versions of the plots of force vs  $Ed^2$  from Figure 2 in the main text are contained in Figure S2, Figure S3, and Figure S4. Similarly, the force displacement plots from Figure 4a are shown in Figure S5.

<sup>a</sup> Department of Chemical Engineering, University of California Santa Barbara, Santa Barbara, CA 93106, USA.

<sup>b</sup> Department of Mechanical Engineering, University of California Santa Barbara, Santa Barbara, CA 93106, USA.

<sup>c</sup> Current Address: School of Polymer Science and Polymer Engineering, University of Akron, Akron OH, 44325, USA.

<sup>d</sup> Department of Applied Mechanics, Faculty of Mechanical Engineering, Budapest University of Technology and Economics, Műgyetem rkp. 3., H-1111 Budapest, Hungary

<sup>e</sup> Materials Department, University of California Santa Barbara, Santa Barbara, CA 93106, USA.

\* Corresponding Authors Email: helgeson@ucsb.edu, valentine@engineering.ucsb.edu

‡ Additional footnotes to the title and authors can be included e.g. 'Present address:' or 'These authors contributed equally to this work' as above using the symbols: ‡, §, and ¶. Please place the appropriate symbol next to the author's name and include a \footnotetext entry in the the correct place in the list.

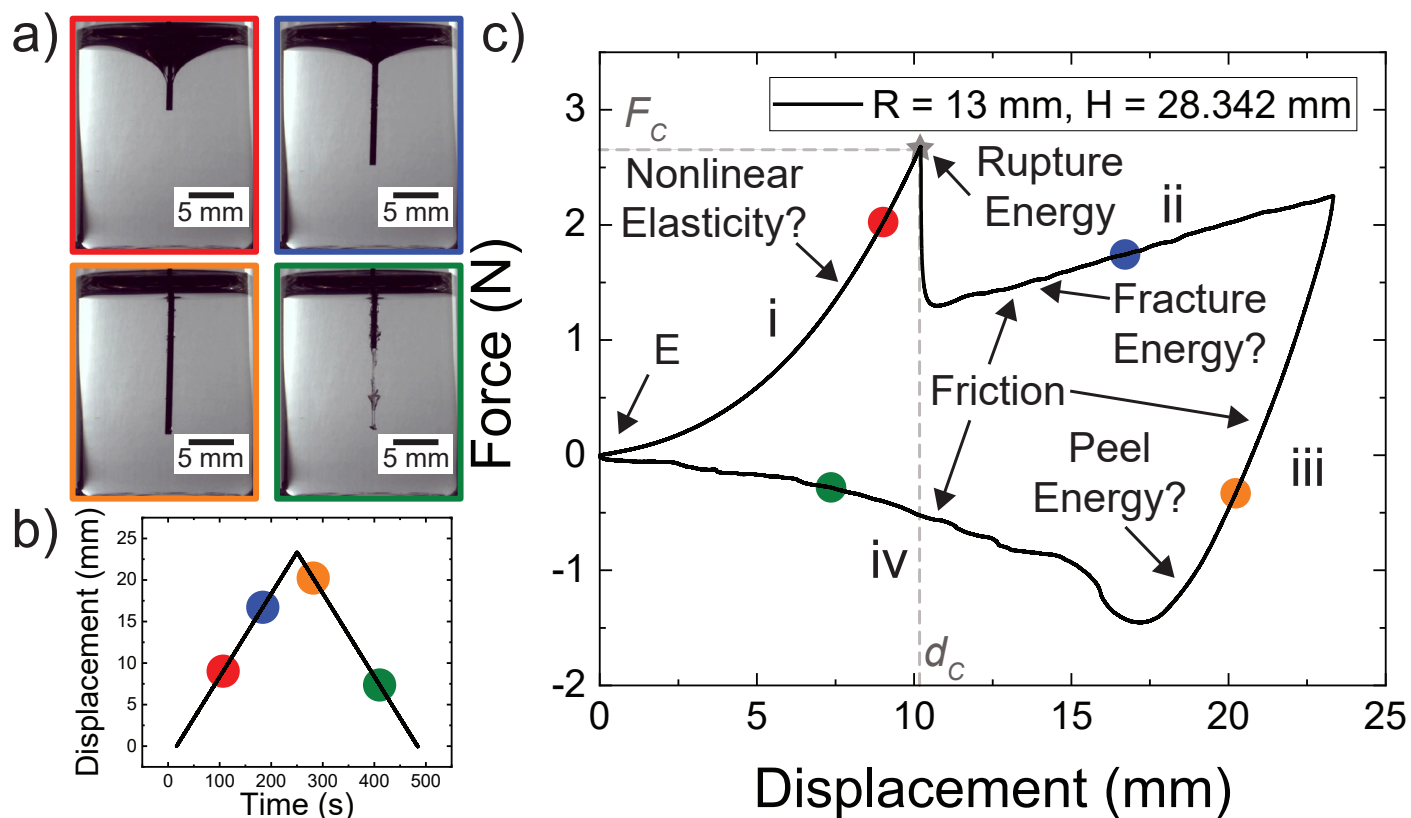

**Fig. S1** An enlarged version of Figure 1 from the main text. a) Images during the four stages of deep indentation and puncture from a representative run in a vial performed with a sample radius of 13 mm and height of 28.342 mm at a displacement rate of 0.1 mm/s. b) Plot of the imposed displacement against time with the image locations marked via colored circles. c) Plot of the measured force against displacement during deep indentation and puncture with the four stages of this test marked (i-iv). The critical puncture force  $F_c$  and displacement  $d_c$  are marked by the grey star and dashed lines. Additionally, the mechanical behavior that can be characterized during each stage has been labeled with underexplored areas denoted by question marks.



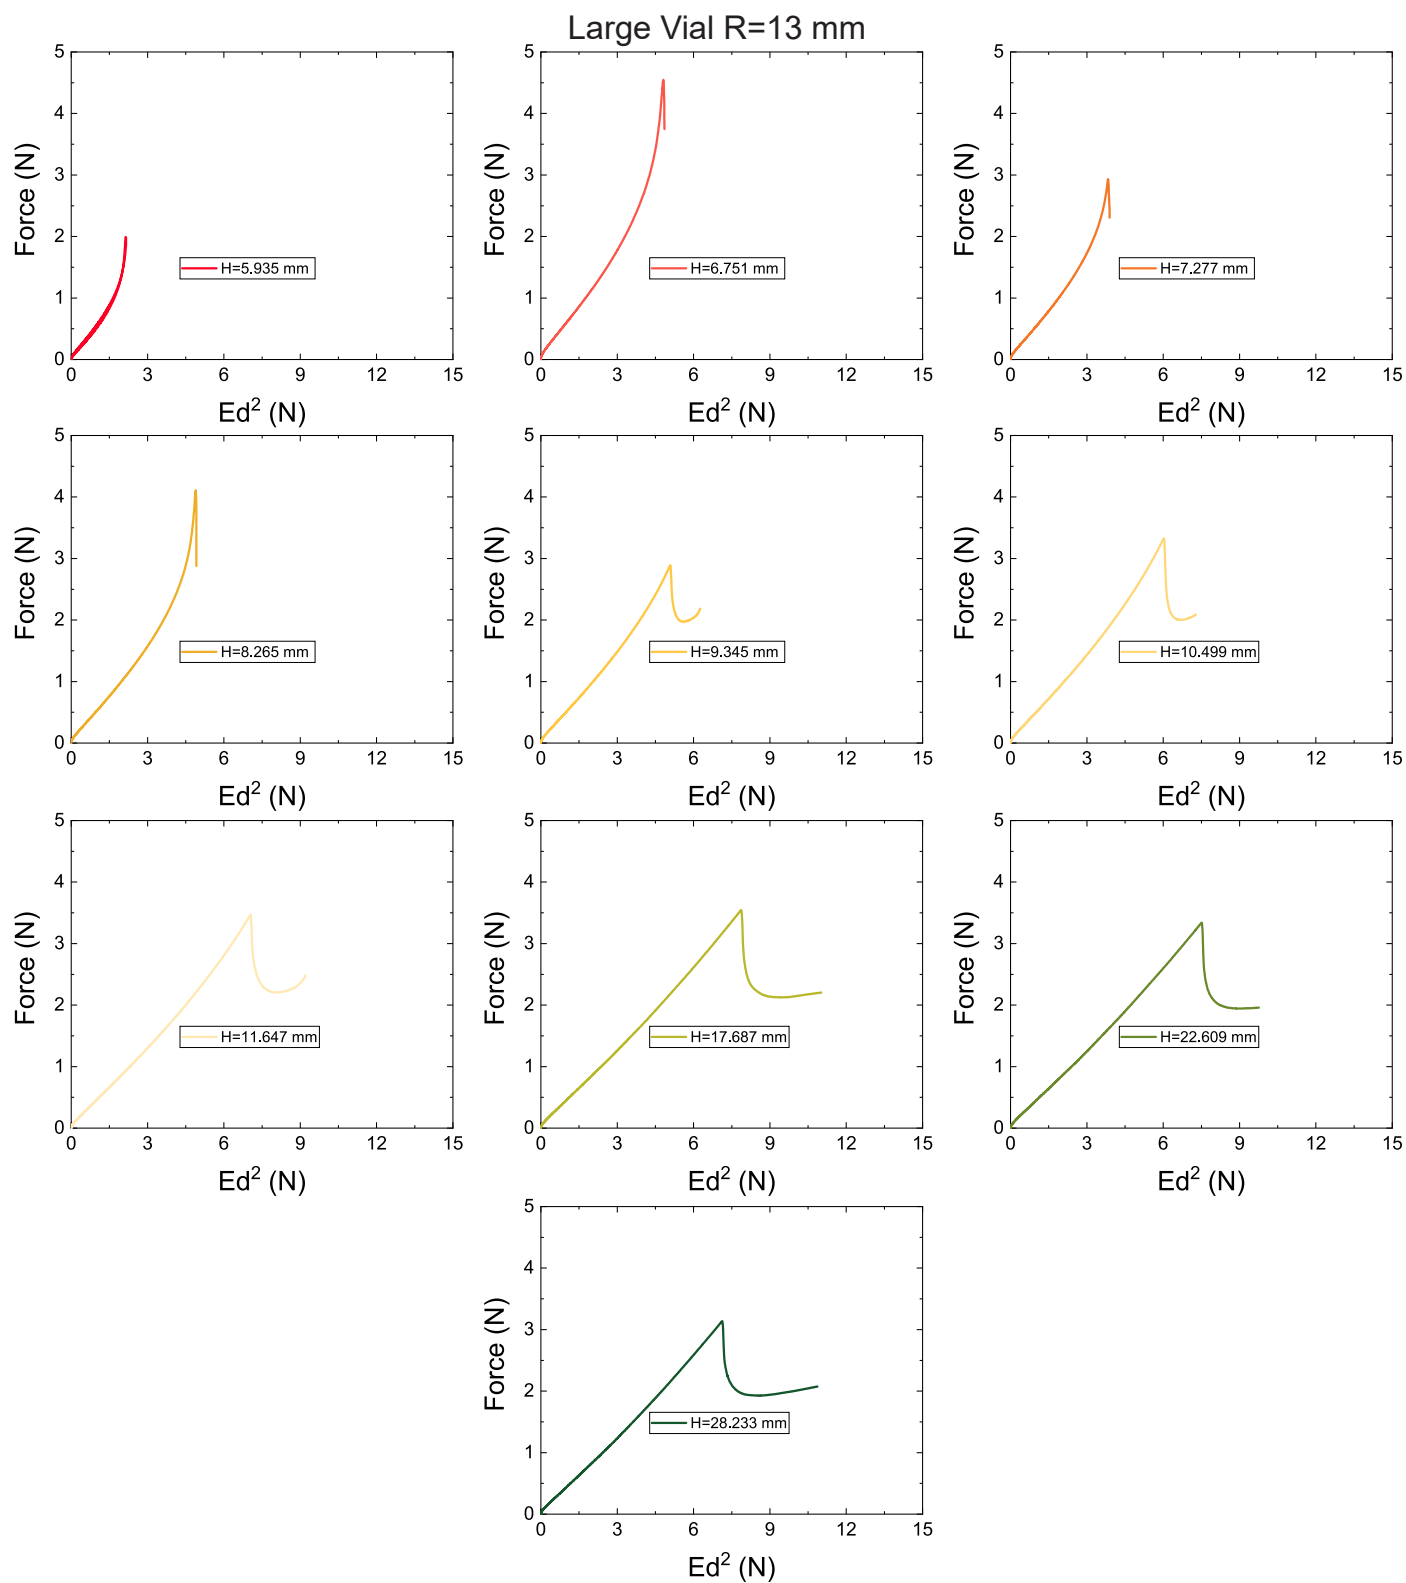

**Fig. S2** Expanded plots from Figure 2a in the main text.

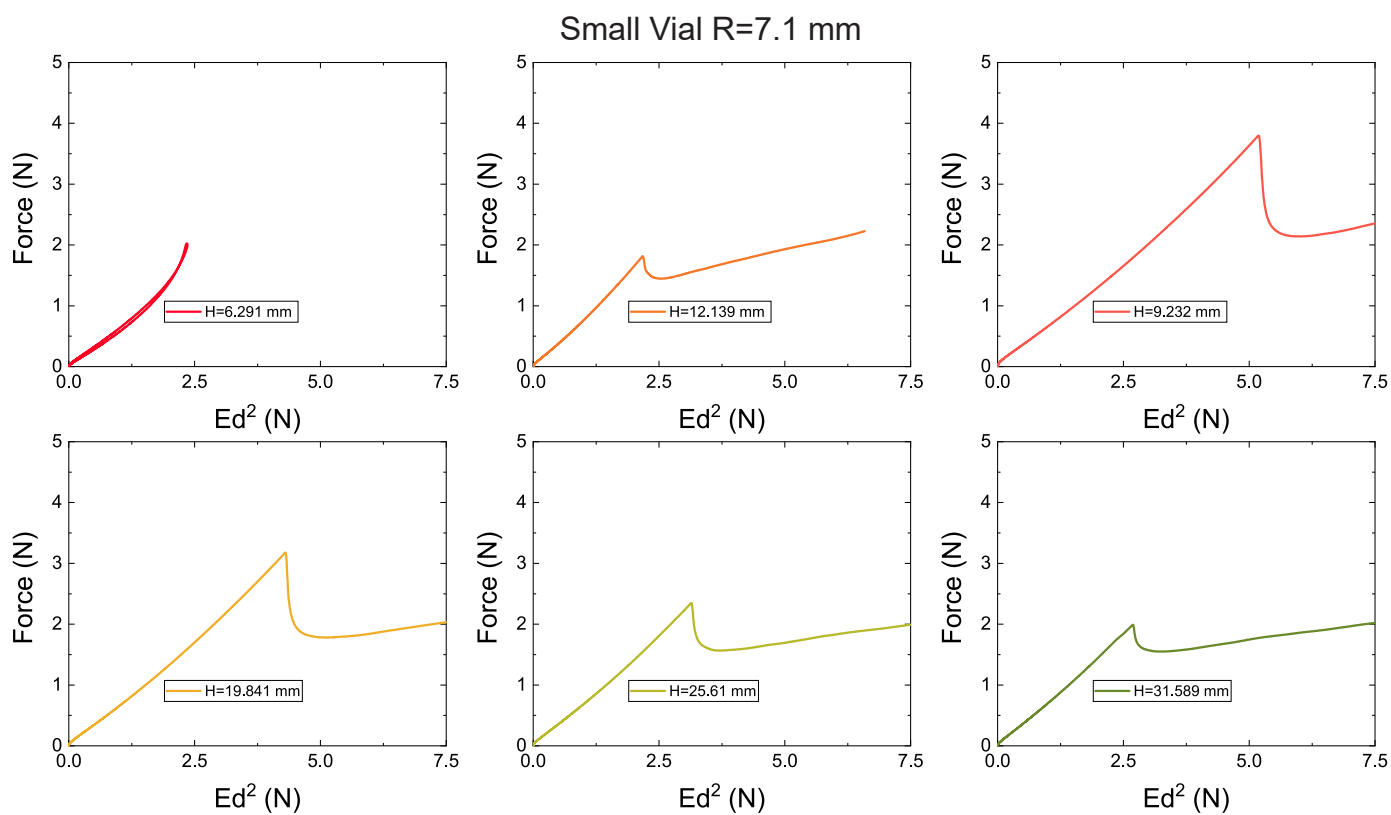

Fig. S3 Expanded plots from Figure 2b in the main text.

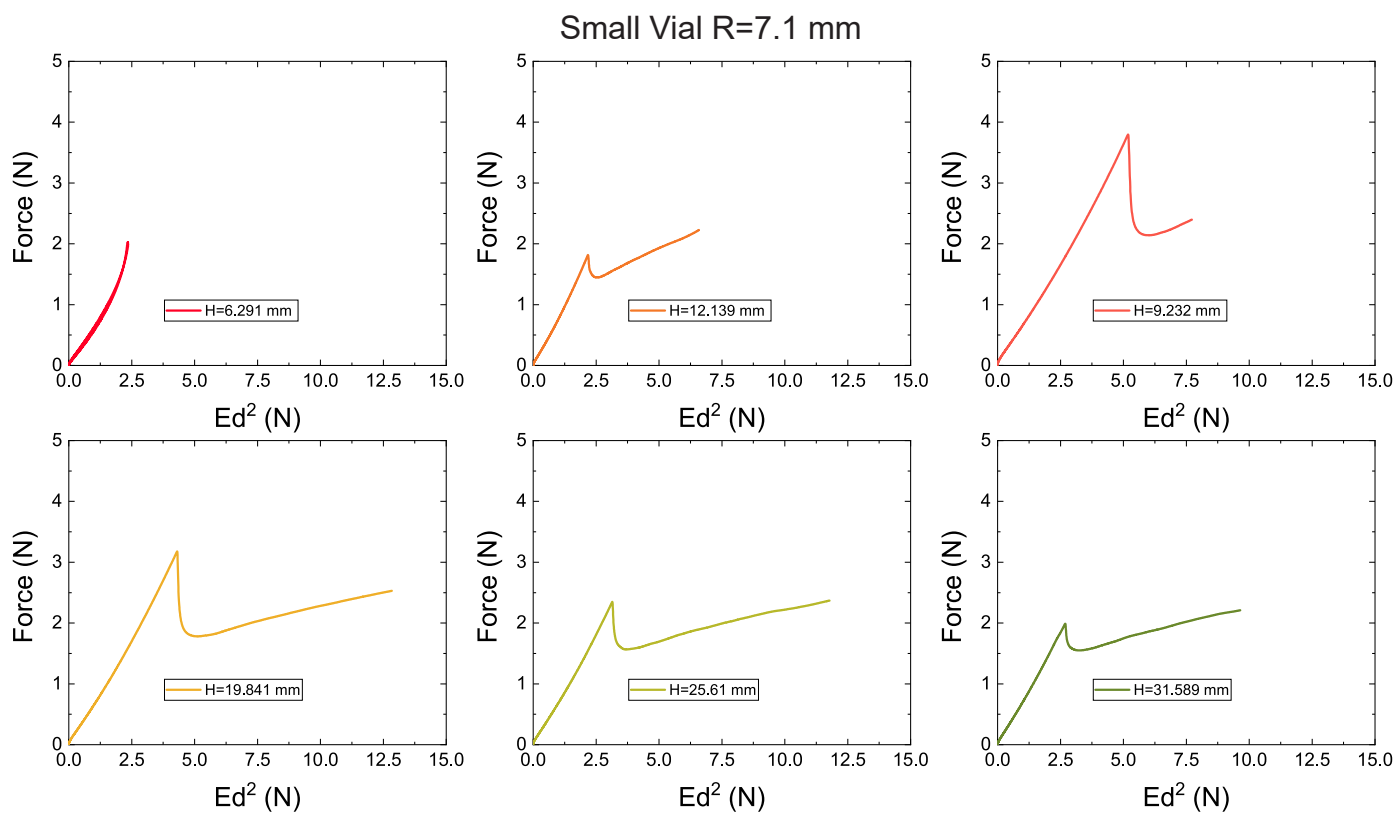

Fig. S4 Expanded plots from Figure 2b in the main text with the same x axis as Figure 2a.

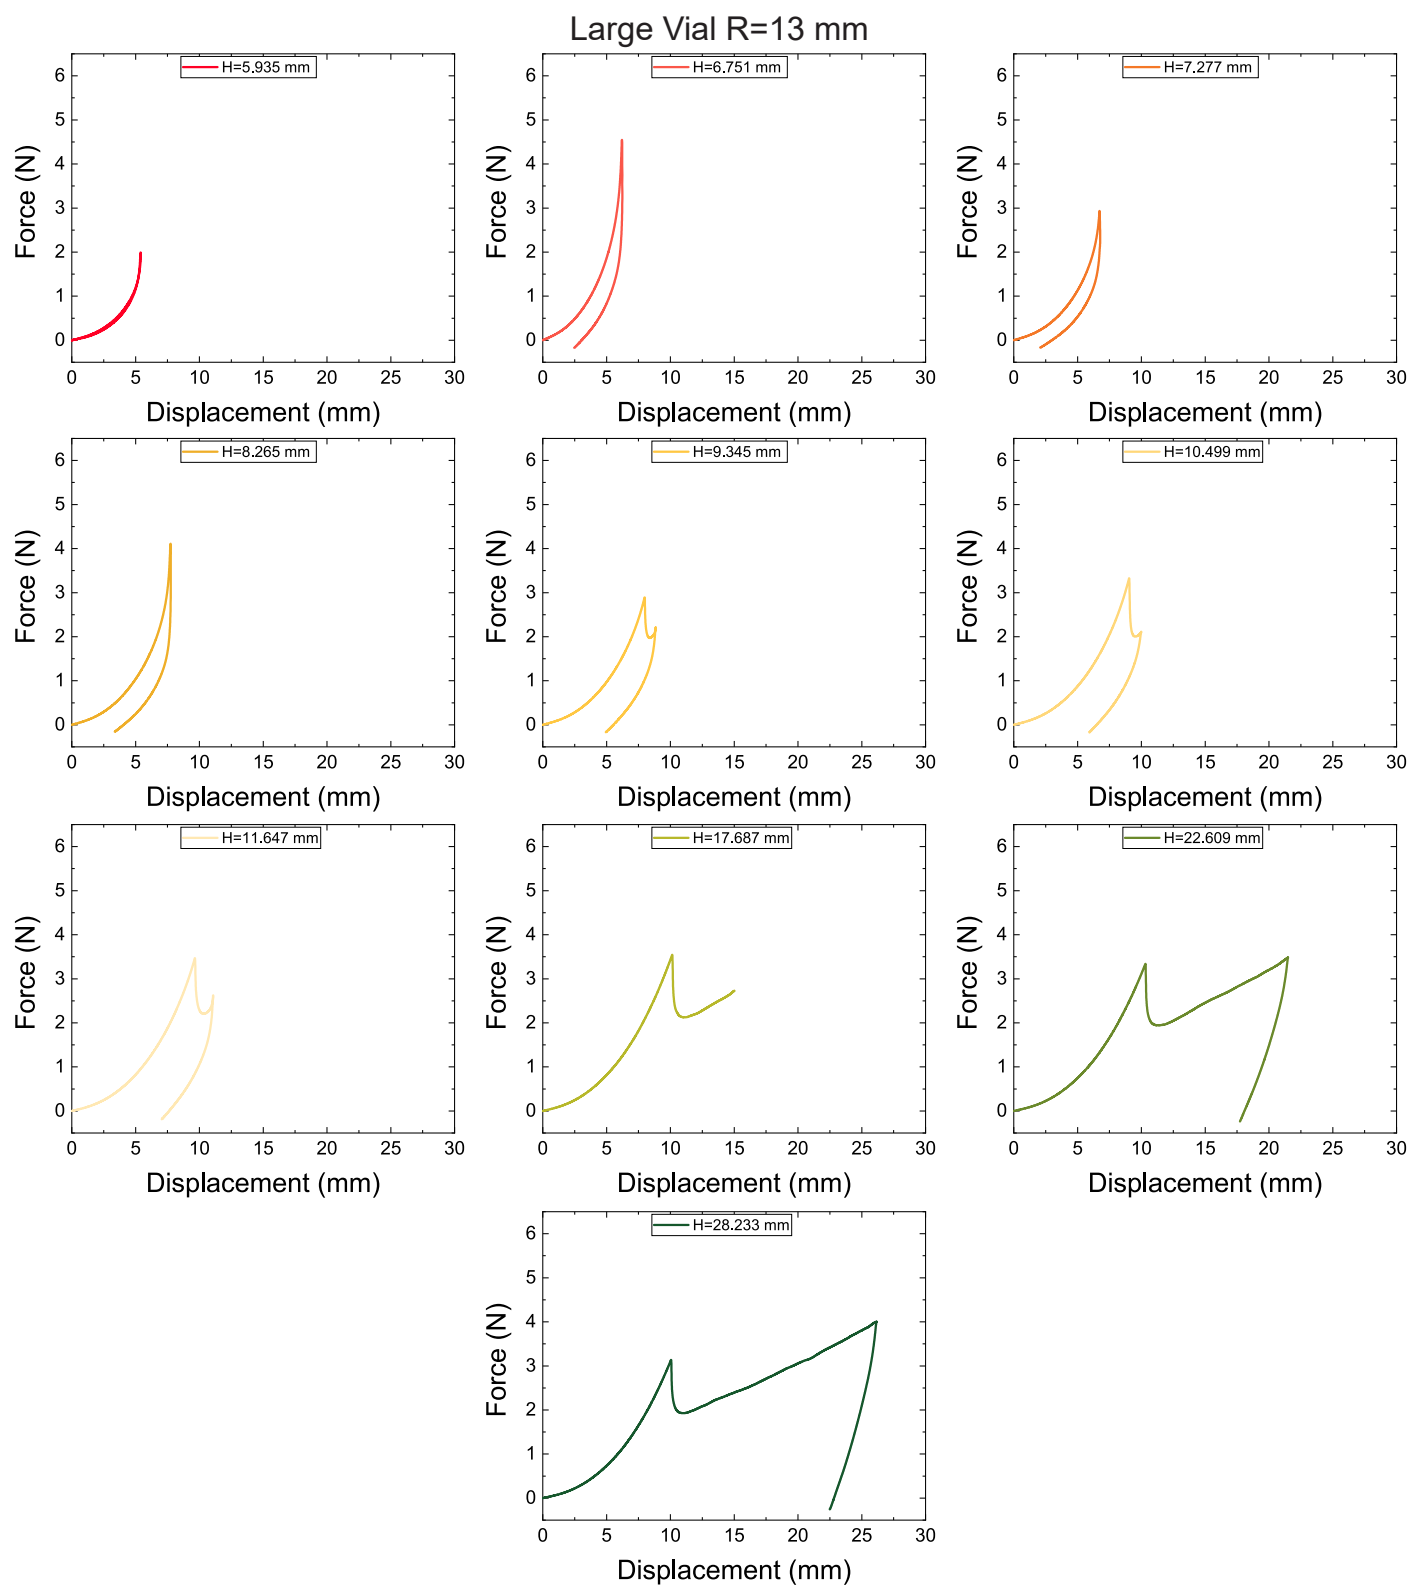

**Fig. S5** Expanded plots from Figure 4a in the main text.

**Table S1** Summary of the variable height deep indentation and puncture data gathered in this work.  $R$ ,  $H$ , and  $E$  were quantified by small strain indentation. NP stands for no puncture and T stands for tubular.

| Sample     | $R$ (mm) | $a$ (mm) | $H$ (mm) | $E$ (kPa) | $d_c$ (mm) | $F_c$ (N) | Crack Morphology |
|------------|----------|----------|----------|-----------|------------|-----------|------------------|
| Big3-1     | 13       | 0.359    | 5.935    | 73.6      | 5.435      | –         | NP               |
| Big3-2     | 13       | 0.359    | 5.723    | 65.1      | 5.224      | –         | NP               |
| Big3-3     | 13       | 0.359    | 5.663    | 73.4      | 5.150      | –         | NP               |
| Big3.5-1   | 13       | 0.359    | 6.751    | 125.9     | 6.224      | 4.5425    | T                |
| Big3.5-2   | 13       | 0.359    | 6.718    | 126.9     | 6.013      | 4.5505    | T                |
| Big3.5-3   | 13       | 0.359    | 6.604    | 116.1     | 5.564      | 2.2113    | T                |
| Big4-1     | 13       | 0.359    | 7.277    | 84.8      | 6.723      | 2.9328    | T                |
| Big4-2     | 13       | 0.359    | 7.365    | 82.3      | 6.863      | 3.4357    | T                |
| Big4-3     | 13       | 0.359    | 7.494    | 88.4      | 6.979      | –         | NP               |
| Big4.5-1   | 13       | 0.359    | 8.265    | 81.8      | 7.751      | 4.1103    | T                |
| Big4.5-2   | 13       | 0.359    | 8.367    | 81.7      | 7.662      | 3.0451    | T                |
| Big4.5-3   | 13       | 0.359    | 8.309    | 80.2      | 7.773      | 3.7672    | T                |
| Big5-1     | 13       | 0.359    | 9.345    | 79.8      | 7.970      | 2.8921    | T                |
| Big5-2     | 13       | 0.359    | 9.492    | 80.6      | 7.854      | 2.6244    | T                |
| Big5-3     | 13       | 0.359    | 9.613    | 83.3      | 8.281      | 3.2131    | T                |
| Big5.5-1   | 13       | 0.359    | 10.499   | 73.6      | 9.051      | 3.3271    | T                |
| Big5.5-2   | 13       | 0.359    | 10.503   | 71.8      | 8.459      | 2.7294    | T                |
| Big5.5-3   | 13       | 0.359    | 10.658   | 75.8      | 8.321      | 2.5889    | T                |
| Big6-1     | 13       | 0.359    | 11.647   | 75.6      | 9.712      | 3.4684    | T                |
| Big6-2     | 13       | 0.359    | 11.058   | 73.0      | 8.744      | 2.7186    | T                |
| Big6-3     | 13       | 0.359    | 11.598   | 75.9      | 8.556      | 2.5402    | T                |
| Big9-1     | 13       | 0.359    | 17.687   | 76.4      | 10.194     | 3.5457    | T                |
| Big9-2     | 13       | 0.359    | 17.129   | 72.8      | 9.917      | 3.1367    | T                |
| Big9-3     | 13       | 0.359    | 16.838   | 68.5      | 9.645      | 2.7165    | T                |
| Big12-1    | 13       | 0.359    | 22.609   | 70.5      | 10.429     | 3.3383    | T                |
| Big12-2    | 13       | 0.359    | 22.996   | 67.1      | 8.298      | 1.9307    | T                |
| Big12-3    | 13       | 0.359    | 22.551   | 66.4      | 9.579      | 2.5394    | T                |
| Big15-1    | 13       | 0.359    | 28.233   | 70.5      | 10.143     | 3.1384    | T                |
| Big15-2    | 13       | 0.359    | 28.358   | 66.8      | 7.13       | 1.3813    | T                |
| Big15-3    | 13       | 0.359    | 28.069   | 67.7      | 10.878     | 3.5208    | T                |
| Small1-1   | 7.1      | 0.359    | 6.291    | 68.8      | 5.778      | –         | NP               |
| Small1-2   | 7.1      | 0.359    | 6.180    | 65.6      | 5.673      | –         | NP               |
| Small1-3   | 7.1      | 0.359    | 6.406    | 64.8      | 5.899      | –         | NP               |
| Small1.5-1 | 7.1      | 0.359    | 9.232    | 102.0     | 7.162      | 3.7982    | T                |
| Small1.5-2 | 7.1      | 0.359    | 8.987    | 69.7      | 7.810      | 3.1123    | T                |
| Small1.5-3 | 7.1      | 0.359    | 10.080   | 58.1      | 8.126      | 2.8328    | T                |
| Small2-1   | 7.1      | 0.359    | 12.139   | 49.0      | 6.708      | 1.8158    | T                |
| Small2-2   | 7.1      | 0.359    | 12.105   | 66.7      | 7.119      | 2.3718    | T                |
| Small2-3   | 7.1      | 0.359    | 13.222   | 65.9      | 8.003      | 3.1207    | T                |
| Small3-1   | 7.1      | 0.359    | 19.841   | 67.9      | 8.007      | 3.1767    | T                |
| Small3-2   | 7.1      | 0.359    | 18.749   | 66.6      | 7.935      | 2.9940    | T                |
| Small3-3   | 7.1      | 0.359    | 18.629   | 59.4      | 7.830      | 2.8569    | T                |
| Small4-1   | 7.1      | 0.359    | 25.610   | 64.6      | 7.035      | 2.3476    | T                |
| Small4-2   | 7.1      | 0.359    | 25.618   | 63.4      | 7.181      | 2.5027    | T                |
| Small4-3   | 7.1      | 0.359    | 25.661   | 65.4      | 7.099      | 2.3942    | T                |
| Small5-1   | 7.1      | 0.359    | 31.589   | 61.4      | 6.626      | 1.9887    | T                |
| Small5-2   | 7.1      | 0.359    | 31.662   | 58.0      | 7.668      | 2.8192    | T                |
| Small5-3   | 7.1      | 0.359    | 30.830   | 61.9      | 7.613      | 2.8224    | T                |
| EXT        | 23.5     | 0.359    | 30       | 33.053    | 12.4       | 1.69118   | T                |
| EXT        | 23.5     | 0.359    | 30       | 32.46     | 14.2       | 2.24488   | T                |
| EXT        | 23.5     | 0.359    | 30       | 32.15     | 13.2       | 1.8895    | T                |

**Table S2** Summary of the variable velocity deep indentation and puncture data gathered in this work.

| Sample    | $R$ (mm) | $a$ (mm) | Velocity (mm/s) | $d_c$ (mm) | $F_c$ (N) | $\frac{\partial F}{\partial d}$ (N/m) | $F_{prop}$ (mN) |
|-----------|----------|----------|-----------------|------------|-----------|---------------------------------------|-----------------|
| Big15-1   | 13       | 0.359    | 0.1             | 10.370     | 2.7164    | 61.08                                 | 542.1           |
| Big15-2   | 13       | 0.359    | 0.1             | 10.192     | 2.6818    | 78.48                                 | 439.5           |
| Big15-3   | 13       | 0.359    | 0.1             | 10.193     | 2.6892    | 71.43                                 | 620.6           |
| Big15-4   | 13       | 0.359    | 0.1             | 10.263     | 2.7757    | 90.18                                 | 388.1           |
| Big15-5   | 13       | 0.359    | 1               | 9.081      | 2.0110    | 119.07                                | 353.3           |
| Big15-6   | 13       | 0.359    | 1               | 8.953      | 1.9078    | 130.20                                | 218.65          |
| Big15-7   | 13       | 0.359    | 1               | 8.837      | 1.9389    | 135.84                                | 190.67          |
| Big15-8   | 13       | 0.359    | 1               | 9.150      | 2.1710    | 128.18                                | 338.20          |
| Big15-9   | 13       | 0.359    | 10              | 9.564      | 2.4996    | 221.88                                | -122.82         |
| Big15-10  | 13       | 0.359    | 10              | 9.714      | 2.4217    | 226.43                                | -236.61         |
| Big15-11  | 13       | 0.359    | 10              | 9.262      | 2.5171    | 242.14                                | -315.70         |
| Big15-12  | 13       | 0.359    | 10              | 9.812      | 2.6215    | 224.97                                | -81.42          |
| Small5-1  | 13       | 0.359    | 0.1             | 8.904      | 2.8749    | 20.00                                 | 988.00          |
| Small5-2  | 13       | 0.359    | 0.1             | 8.752      | 2.7280    | 40.71                                 | 488.73          |
| Small5-3  | 13       | 0.359    | 0.1             | 8.694      | 2.8867    | 10.73                                 | 1116.96         |
| Small5-4  | 13       | 0.359    | 0.1             | 8.231      | 2.6306    | 55.87                                 | 464.21          |
| Small5-5  | 13       | 0.359    | 1               | 7.595      | 2.3455    | 95.02                                 | 718.33          |
| Small5-6  | 13       | 0.359    | 1               | 7.179      | 1.9256    | 121.76                                | 471.58          |
| Small5-7  | 13       | 0.359    | 1               | 7.283      | 1.8827    | 114.52                                | 523.89          |
| Small5-8  | 13       | 0.359    | 1               | 8.038      | 2.5896    | 95.08                                 | 836.18          |
| Small5-9  | 13       | 0.359    | 10              | 7.015      | 2.0167    | 238.49                                | 112.38          |
| Small5-10 | 13       | 0.359    | 10              | 7.714      | 2.4634    | 242.46                                | -72.00          |
| Small5-11 | 13       | 0.359    | 10              | 7.712      | 2.7328    | 216.61                                | 218.87          |
| Small5-12 | 13       | 0.359    | 10              | 7.065      | 2.1950    | 229.74                                | 168.77          |

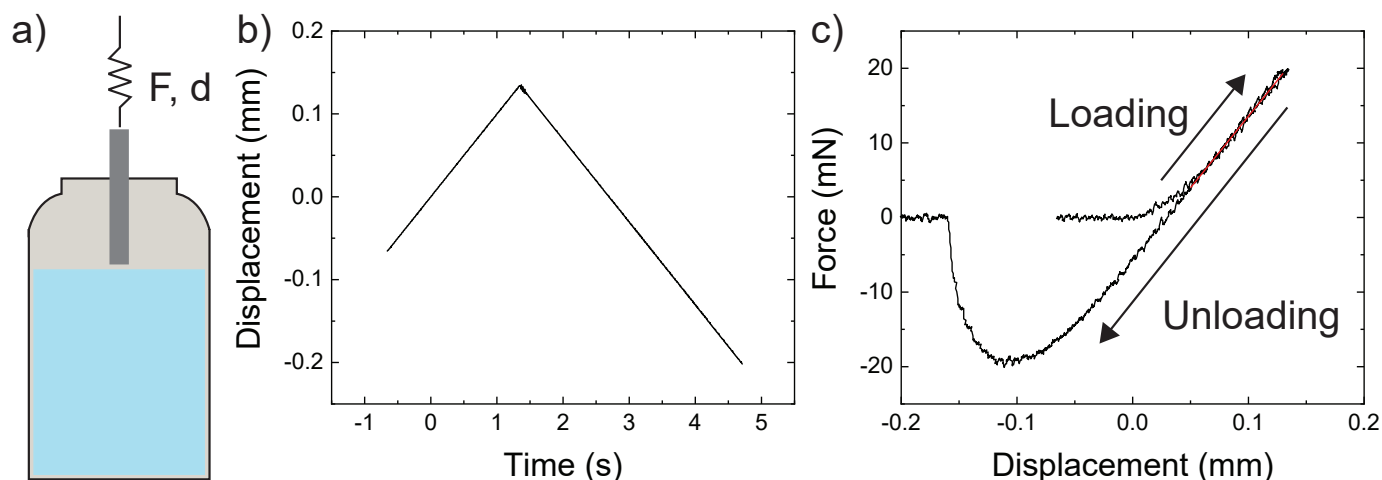

**Fig. S6** a) A schematic of the setup used for performing small strain indentation. b) An example plot of the imposed displacement vs time curve for small strain indentation using a 2 mm diameter steel cylinder on a gel with  $R = 13$  mm and  $H = 28.233$  mm. c) A example plot of the force-displacement curve for the same sample showing how the stiffness ( $S = 191.8 \pm 0.9$  N/m) is extracted from this curve.

## 2 Additional Characterization

### 2.1 Small Strain Indentation

Deep indentation and puncture were performed on a TA.XTPlus Connect Texture Analyzer with a 50 N load cell. Large vials were tested with a 2 mm diameter ( $a = 1$  mm) flat cylindrical probe and small vials were tested with the 22 gauge (inner and outer radius of 0.207 mm and  $a = 0.359$  mm, respectively) blunt-tipped steel needle used during puncture measurements. Measurements were performed at a displacement rate of 0.1 mm/s to a turnaround force of 20 mN. A schematic of the setup and plots of representative data are shown in Figure S6. The displacement shown in these plots has been shifted so that the zero point is defined by the initial point of contact between the probe and the material. The initial location of the probe was noted before running each test and was combined with the initial contact displacement to infer the sample height  $H$  values reported in Table S1.

Values of  $E$  were extracted from these measurements using the observed sample stiffness  $S$ , obtained from the slope of the red fit line Figure S6C. This stiffness can be used in combination with sample dimensions to calculate  $E$  using,<sup>1</sup>

$$E = \frac{3S}{8a} \left[ 1 + 1.33 \frac{a}{H} + 1.33 \left( \frac{a}{H} \right)^3 \right]^{-1}, \quad (\text{S1})$$

which combines classic Hertzian contact mechanics with a correction factor for the finite axial size of the sample (approximately 1 for all sample heights tested).  $E$  values calculated in this manner are reported in Table S1.

Plots of the sample volume  $V$  against the resulting sample height are contained in Figure S7. The slope on this plot is defined by the relationship,

$$\frac{V}{H} = \pi R^2, \quad (\text{S2})$$

where  $R$  is the radius of the sample. These fits indicate that  $R = 7.1$  mm and  $R = 13$  mm in the small and large vials, respectively.

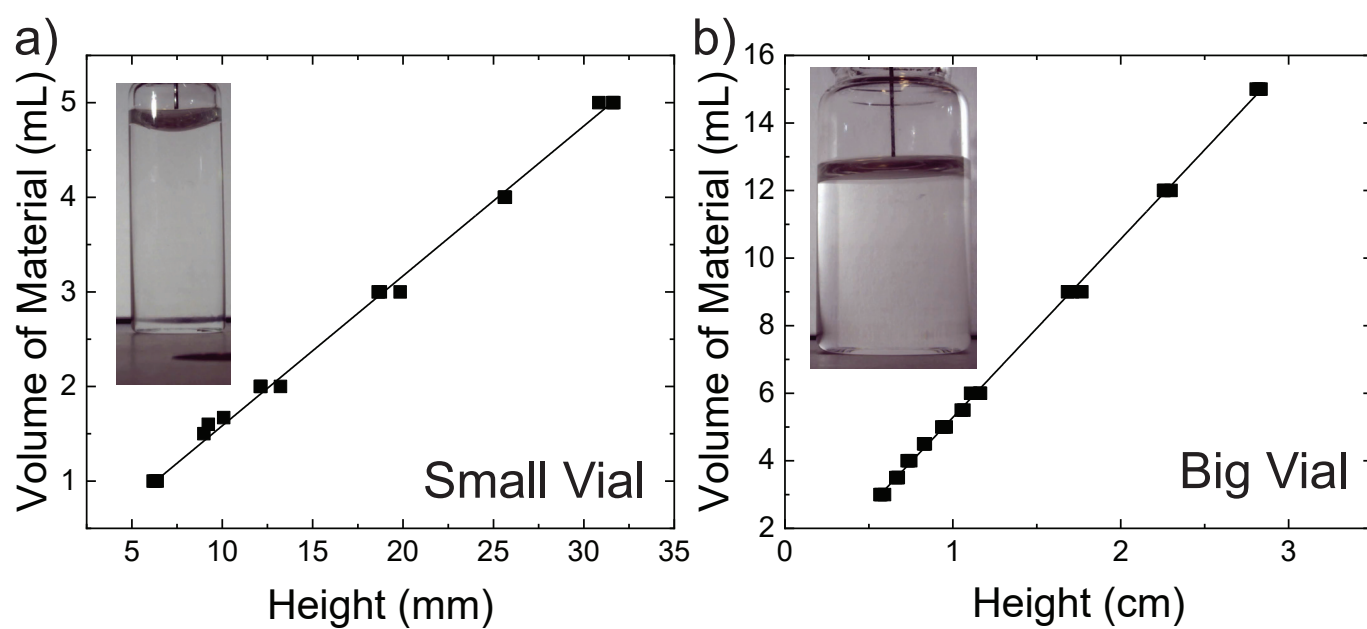

**Fig. S7** Plots of the volume of material used to make samples against the measured sample height for the a) small and b) big vial. The fitted slope for the small ( $0.1585 \pm 0.0009$  mL/mm) and big ( $5.28 \pm 0.02$  mL/cm) were used to infer internal vial radius values of  $R = 7.1$  mm and  $R = 13$  mm using Equation (S2).

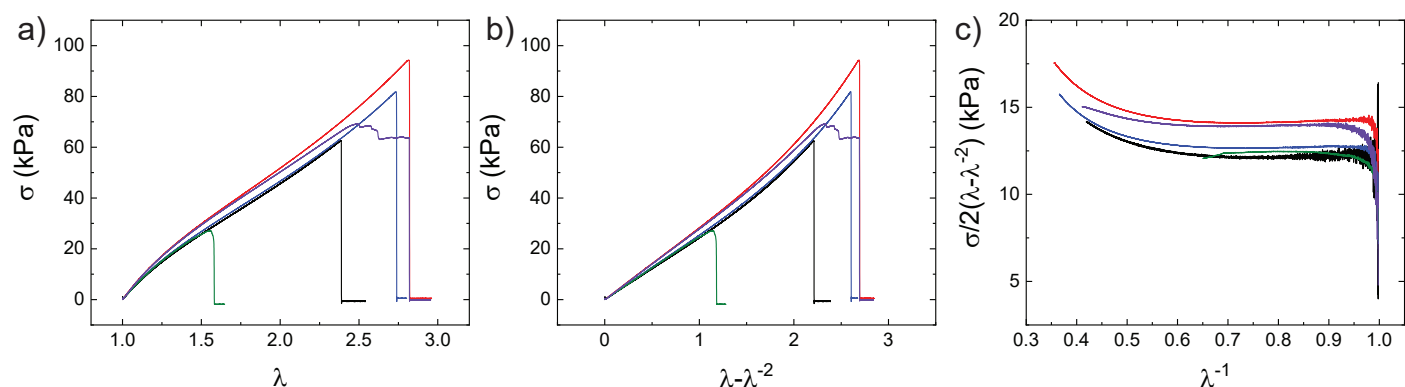

**Fig. S8** Plots of the engineering stress  $\sigma$  against a)  $\lambda$  and b)  $\lambda - \lambda^{-2}$  for uniaxial extension. Additionally a Mooney plot is contained in c). These tests suggest that this material displays some strain stiffening and little to no dependence on the  $\frac{dW}{d\epsilon}$  term.

## 2.2 Constitutive Response

### 2.2.1 Uniaxial Extension

Uniaxial extension was performed on a TA.XTPlus Connect Texture Analyzer with a 50 N load cell and monitored with a Dino-Lite Edge Plus AM4117 series 1.3 MP camera. Measurements were performed on rectangular strips that maintained a length to width ratio of at least three for all samples. Samples were stretched at a velocity of 1 mm/s (approximate strain rate of  $0.025 \text{ s}^{-1}$ ) until sample failure or slip at the clamp occurred.

Different representations of these measurements in the form of plots of a) the engineering stress  $\sigma$  vs stretch ratio  $\lambda$ , b)  $\sigma$  vs  $\lambda - \lambda^{-2}$ , and c)  $\frac{\sigma}{2(\lambda - \lambda^{-2})}$  vs  $\lambda^{-1}$  are shown in Figure S8. The large spread observed in the ultimate failure strain is likely caused by the use of rectangular strips instead of dogbone shaped samples, which allows stress concentrations at the clamp to influence the failure point.  $E$  reported in the main text was extracted from the initial linear region of plot b) where the slope is  $\frac{E}{3}$ .<sup>2</sup> The plot in b) is used for this because the fit can be extracted from data up to  $\sim 50\%$  strain instead of the  $\sim 10\%$  strain (where the experimental errors can be large) that is usable from the plot in a). The Mooney plot representation<sup>3,4</sup> in c) highlights that significance of these errors in the first 5–10%. The horizontal plateau observed once these errors become negligible suggests that this material has little to no dependence on the  $\frac{dW}{d\epsilon}$  in tension. Some strain

stiffening of the samples is apparent in all three representations.

Data from cyclic extension measurements is shown in Figure S9. A sample was strained at a rate of 1 mm/s ( $0.03 \text{ s}^{-1}$ ) to a maximum turnaround strain for 5 cycles before the strain was increased for a further 5 cycles; this process was repeated with incremental increases in strain until the sample eventually failed. The displacement vs time curve and resulting force vs displacement curve are shown in Figure S9a-b. This measurement shows that the loading and unloading curve are nearly identical and overlap well. A plot of the resilience and max applied strain against cycle number is shown in Figure S9c. The resilience is calculated as the percent of energy recovered during one cycle normalized by the energy input during that cycle. For this material, all strains showed a resilience of greater than 94% indicating that there is not significant energy loss during deformation.

### 2.2.2 Uniaxial Compression

Uniaxial compression was performed on a TA.XTPlus Connect Texture Analyzer with a 50 N load cell and monitored with a Dino-Lite Edge Plus AM4117 series 1.3 MP camera. Measurements were performed on circular disks with a diameter of approximately 11.3 mm and heights of approximately 2.6 mm. Samples were compressed between platens lubricated with 100 cSt trimethylsiloxy terminated polydimethylsiloxane at a velocity of 0.1 mm/s (approximate strain rate of  $0.038 \text{ s}^{-1}$ ). Two samples

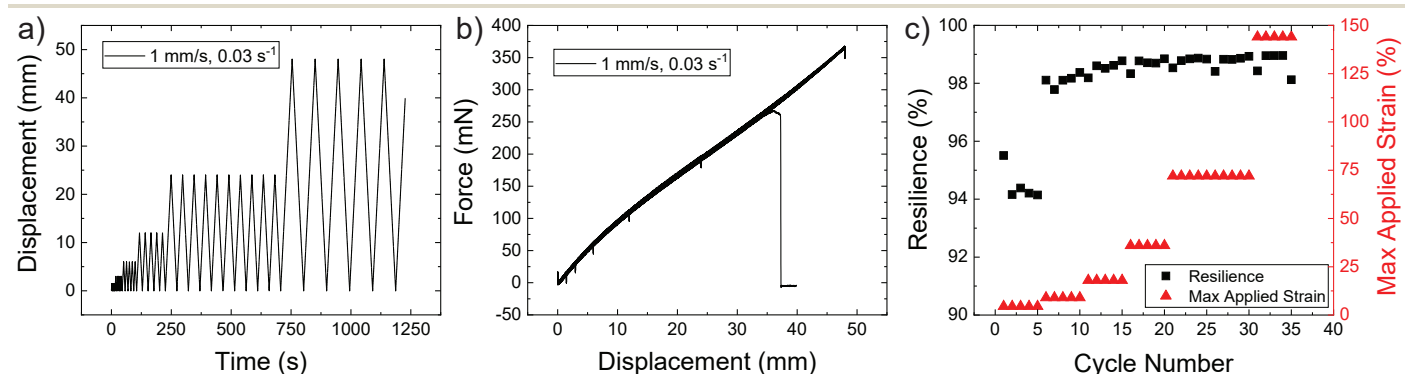

**Fig. S9** Plots of a) displacement vs time and b) force vs displacement for cyclic extension measurements. A plot c) of resilience and max applied strain vs cycle number shows that there is not significant energy loss during deformation.



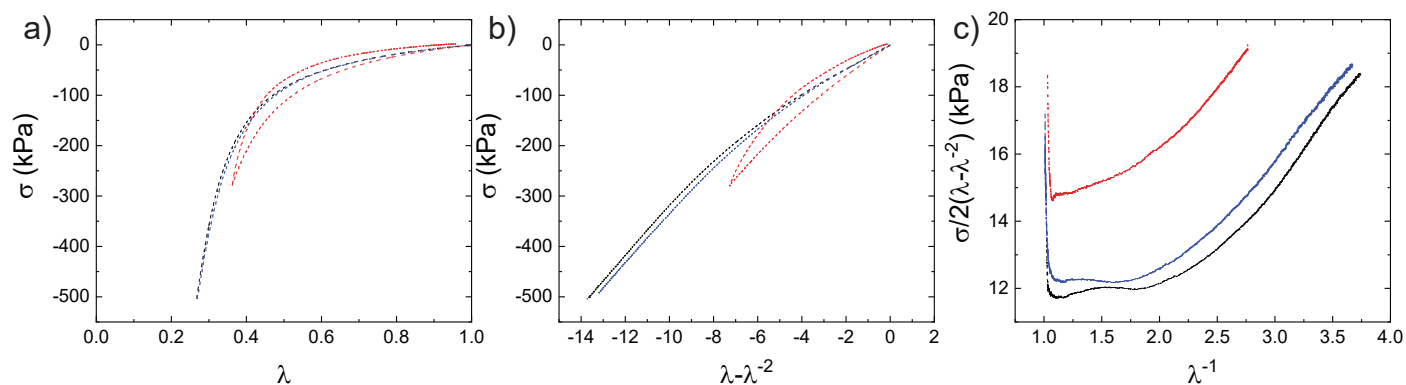

**Fig. S10** Plots of the engineering stress  $\sigma$  against a)  $\lambda$  and b)  $\lambda - \lambda^{-2}$  for uniaxial compression. Additionally a Mooney plot is contained in c). These tests suggest that this material displays some strain stiffening and little to no dependence on the  $\frac{dW}{dI_2}$  term at small strains.

were stopped once the force hit 50 N (the capacity of the load cell employed) while a third sample was stopped at a turnaround displacement of 3.5 mm ( $\lambda \approx 0.38$ ).

Different representations of these measurements in the form of plots of a) the engineering stress  $\sigma$  vs stretch ratio  $\lambda$ , b)  $\sigma$  vs  $\lambda - \lambda^{-2}$ , and c)  $\frac{\sigma}{2(\lambda - \lambda^{-2})}$  vs  $\lambda^{-1}$  are shown in Figure S10. The  $\sigma$  vs  $\lambda$  curve shows similar moduli before increasing in stress. The  $\sigma$  vs  $\lambda - \lambda^{-2}$  curve shows that some strain stiffening occurs beyond that predicted by a simple neo-Hookean model. Finally, the Mooney plot shows that the constitutive response has little to no dependence on  $\frac{dW}{dI_2}$  at small strains before stiffening.

### 2.2.3 Fitting a Strain Energy Density Function

Due to the higher-order nonlinearities and the stress stiffening effects, Ogden's hyperelastic strain energy potential has been adopted for characterizing the elastic behavior of the gel. Furthermore, the incompressibility condition was also applied based on the results of the radially confined compression tests. Therefore, the applied strain energy density potential can be expressed using the notation in Abaqus<sup>5,6</sup> as

$$W = \sum_{i=1}^N \frac{2\mu_i}{\alpha_i^2} (\lambda_1^{\alpha_i} + \lambda_2^{\alpha_i} + \lambda_3^{\alpha_i} - 3), \quad (\text{S3})$$

where  $N$  denotes the order of the hyperelastic potential,  $\lambda_1, \lambda_2$  and  $\lambda_3$  are the principal stretches,  $\mu_i$  and  $\alpha_i$  are material parameters. The initial shear modulus for Ogden's hyperelastic model becomes

$$\mu_0 = \sum_{i=1}^N \mu_i, \quad (\text{S4})$$

which leads for the incompressible case that the Young's modulus is given as

$$E = \sum_{i=1}^N 3\mu_i. \quad (\text{S5})$$

For uniaxial (UA) deformations the deformation gradient can be written as

$$\mathbf{F} = \begin{bmatrix} \lambda & 0 & 0 \\ 0 & \lambda_T & 0 \\ 0 & 0 & \lambda_T \end{bmatrix}, \quad (\text{S6})$$

where  $\lambda$  and  $\lambda_T$  are the stretch in the longitudinal and trans-

verse directions, respectively. The right Cauchy–Green deformation tensor can be expressed as

$$\mathbf{C} = \mathbf{F}^T \mathbf{F} = \begin{bmatrix} \lambda^2 & 0 & 0 \\ 0 & \lambda_T^2 & 0 \\ 0 & 0 & \lambda_T^2 \end{bmatrix}. \quad (\text{S7})$$

Due to incompressibility

$$J = \det \mathbf{F} = \lambda \lambda_T^2 \equiv 1 \quad (\text{S8})$$

holds, and thus

$$\lambda_T = 1/\sqrt{\lambda}. \quad (\text{S9})$$

The principal stretches can be obtained as the eigenvalues and eigenvectors of  $\mathbf{U} = \sqrt{\mathbf{C}}$ , which gives

$$\lambda_1 = \lambda; \quad \lambda_2 = \lambda_T = \lambda^{-1/2}; \quad \lambda_3 = \lambda_T = \lambda^{-1/2}. \quad (\text{S10})$$

Based on the strain energy density function the principal Cauchy stresses can be obtained as

$$\sigma_i = \lambda_i \frac{\partial W}{\partial \lambda_i} + p \quad \text{for } N = 1, 2, 3 \quad (\text{S11})$$

where  $p$  is the unknown hydrostatic stress that can be determined using the stress-free condition in the transverse directions, namely  $\sigma_2 = \sigma_3 \equiv 0$ . After substituting Equation (S3) into Equation (S11), the principal Cauchy stress solutions for uniaxial loading can be expressed as

$$\sigma_1 = \sum_{i=1}^N \lambda_1 \frac{2\mu_i}{\alpha_i} (\lambda_1^{\alpha_i-1}) + p, \quad (\text{S12})$$

$$\sigma_2 = \sigma_3 = \sum_{i=1}^N \lambda_T \frac{2\mu_i}{\alpha_i} (\lambda_T^{\alpha_i-1}) + p. \quad (\text{S13})$$

Using the condition that  $\sigma_2 = \sigma_3 \equiv 0$  and substituting into Equation (S10) the unknown hydrostatic pressure can be obtained as

$$p = - \sum_{i=1}^N \lambda_T \frac{2\mu_i}{\alpha_i} (\lambda_T^{\alpha_i-1}) = - \sum_{i=1}^N \lambda^{-1/2} \frac{2\mu_i}{\alpha_i} (\lambda^{1/2-\alpha_i/2}). \quad (\text{S14})$$

Substituting back into Equation (S12) gives the incompressible

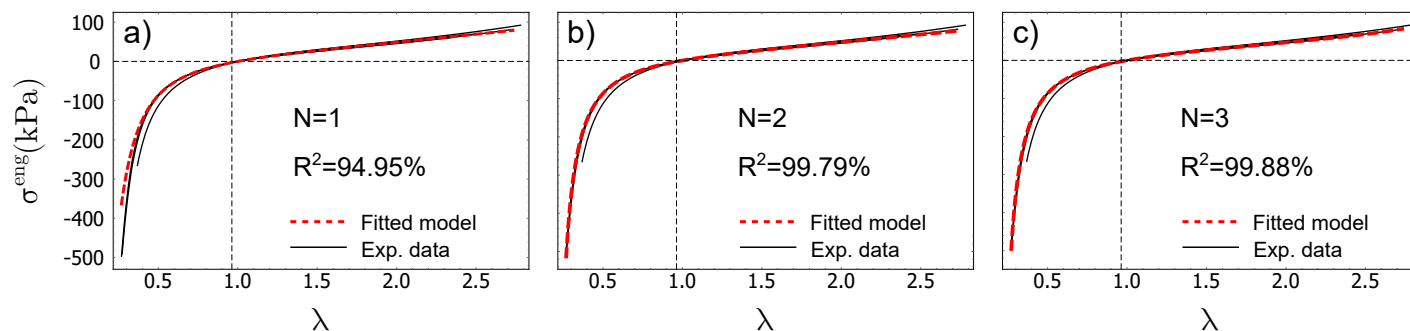

**Fig. S11** The accuracy of the hyperelastic model fitting (total number of measurement points: 354; including 3 compression and 5 tensile test curves)

Cauchy stress solution for uniaxial loading, namely

$$\sigma_1 = \sum_{i=1}^N \frac{2\mu_i}{\alpha_i} \left( \lambda^{\alpha_i} - \lambda^{-\alpha_i/2} \right). \quad (\text{S15})$$

Using the relation between the first Piola–Kirchhoff (engineering) stress ( $\mathbf{P}$ ) and the Cauchy stress ( $\sigma$ ), namely  $\mathbf{P} = J\sigma\mathbf{F}^T$  gives that the incompressible first Piola–Kirchhoff stress solution for uniaxial loading can be written as

$$P_1 = \sigma_1/\lambda, \quad (\text{S16})$$

from which the engineering stress solution becomes

$$\sigma^{\text{eng}} = P_1 = \sum_{i=1}^N \frac{2\mu_i}{\alpha_i} \left( \lambda^{\alpha_i-1} - \lambda^{-\alpha_i/2-1} \right). \quad (\text{S17})$$

Hereafter, the material parameters of Ogden’s hyperelastic potential were fitted to the uniaxial engineering stress curves for both tension and compression (see Figure S11). The quality function was defined as the Mean Squared Difference (MSD), namely

$$Q = \frac{1}{K} \sum_{k=1}^K \left( \sigma_k^{\text{eng,exp}} - \sigma^{\text{eng}}(\lambda_k^{\text{exp}}) \right)^2, \quad (\text{S18})$$

where  $k$  stands for the number of captured data points in uniaxial tests. The global minimization of the quality function using the Nelder-Mead optimization algorithm.<sup>7</sup> The accuracy of the models could be quantified by the coefficient of determination  $R^2$ , which is defined as

$$R^2 = 1 - \frac{\sum_{i=1}^M (f_i^{\text{meas}} - f_i^{\text{fit}})^2}{\sum_{i=1}^M (f_i^{\text{meas}} - \bar{f})^2} \quad (\text{S19})$$

where  $f$  stands for the quantity to be compared, while  $\bar{f}$  is its average value. The value of  $R^2$  should satisfy  $0 < R^2 \leq 1$ , where

$R^2 = 1$  represents the perfect fit.<sup>8</sup>

The results of the parameter fitting to 3 compression and 5 tensile test curves (with  $K = 354$  data point) clearly show that the Ogden’s hyperelastic model is capable of characterizing the uniaxial elastic behavior of the gel. The accuracy of the first-order ( $N = 1$ ) model is acceptable, however at elevated compressive strains the deviation from the measurement curve increases. However, the second and third-order model shows excellent fitting only with minor adjustment in the parameters. The fitted material parameters and the corresponding statistics for the fitting procedures are listed in Table S3. The quality function also indicates shows that the mean squared difference is 0.02501 kPa for the first-order fitting and 0.02255 and 0.02235 for the second- and third-order fits, respectively.

**Table S3** Summary of the fitted material parameters using Ogden’s hyperelastic potential and the fitting statistics

| Model order<br>$N$ | $\mu_1$<br>(kPa) | $\alpha_1$<br>(-) | $\mu_2$<br>(kPa) | $\alpha_2$<br>(-) | $\mu_3$<br>(kPa) | $\alpha_3$<br>(-) | $Q$<br>(kPa) | $R^2$<br>(-) | Fitting time<br>(s) |
|--------------------|------------------|-------------------|------------------|-------------------|------------------|-------------------|--------------|--------------|---------------------|
| 1                  | 24.828           | 2.3712            | -                | -                 | -                | -                 | 0.02501      | 94.95%       | 2.09                |
| 2                  | 24.364           | 2.3873            | 0.0764           | -5.5977           | -                | -                 | 0.02255      | 99.79%       | 25.65               |
| 3                  | 24.558           | 2.3033            | 0.0601           | -5.8438           | 0.001353         | 11.6049           | 0.02235      | 99.88%       | 197.508             |

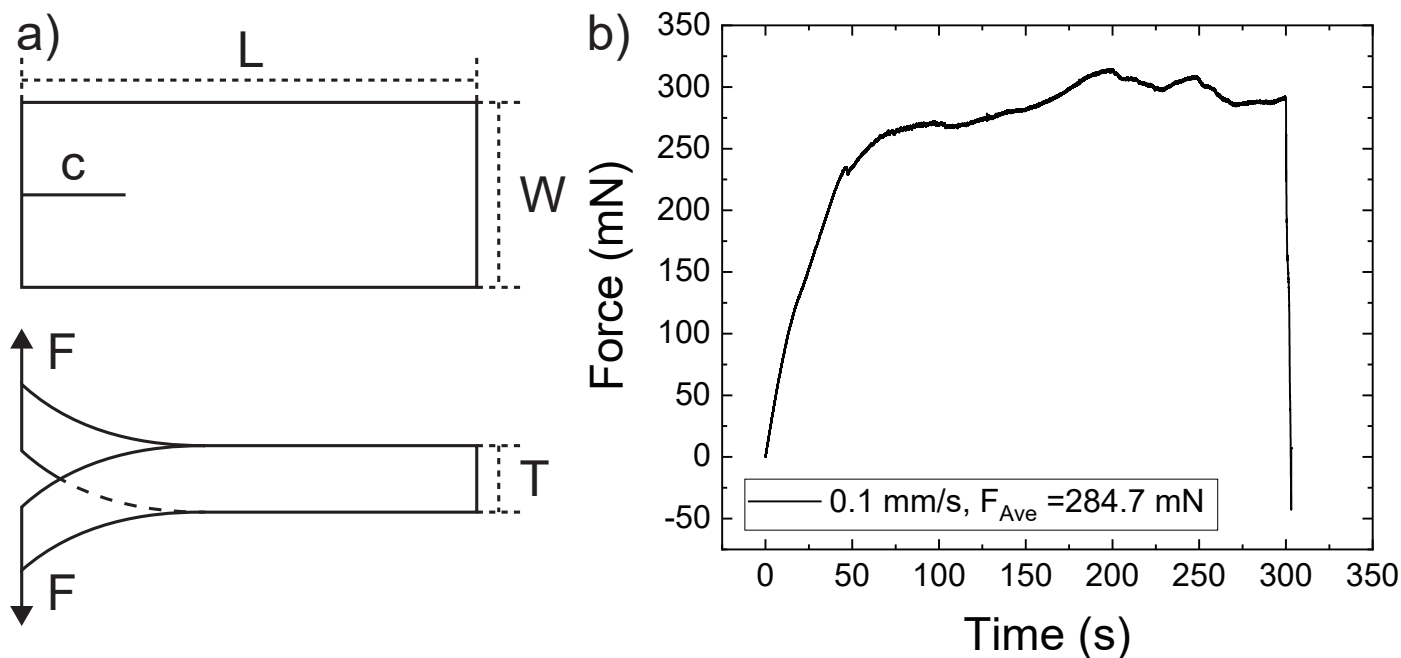

Fig. S12 Schematic of the sample geometry and an example force vs time curve for the tear test performed at 0.1 mm/s.

### 2.3 Tear Tests

Tear tests were performed on a TA.XTPlus Connect Texture Analyzer with a 50 N load cell. Trouser samples where the legs are pulled in opposite directions out-of-plane where used, as shown in Figure S12A. In this geometry, the average propagation force  $F_{Ave}$  can be related to the fracture energy  $G_c$  through the sample thickness  $T$ .<sup>9</sup>

$$G_c = \frac{2F_{Ave}}{T} \quad (S20)$$

This relation assumes that deformation in the legs is negligible. A schematic and plot of example data fort this test is contained in Figure S12.  $F_{Ave}$  is calculated by averaging the force values only during the crack propagation stage. Summary of the data gathered is contained in Table S6.

Table S4 Summary of the tear tests that were performed on trouser samples.

| Sample | Displacement Rate (mm/s) | $c$ (mm) | $L$ (mm) | $W$ (mm) | $T$ (mm) | $F_{Ave}$ (mN) | $G_c$ (N/m) |
|--------|--------------------------|----------|----------|----------|----------|----------------|-------------|
| 0.1-1  | 0.1                      | 27.1     | 89.2     | 49.4     | 2.85     | 272.6          | 191.3       |
| 0.1-2  | 0.1                      | 27.9     | 88.5     | 46.6     | 3.2      | 284.7          | 177.9       |
| 0.1-3  | 0.1                      | 29.4     | 89.3     | 48.4     | 2.77     | 262.2          | 189.3       |
| 1-1    | 1                        | 25.1     | 88.3     | 50.3     | 2.83     | 435.2          | 307.6       |
| 1-2    | 1                        | 25.9     | 87.8     | 48.9     | 2.1      | 360.2          | 343.0       |
| 1-3    | 1                        | 23.5     | 88.3     | 50.6     | 2.8      | 341.7          | 244.1       |
| 1-4    | 1                        | 28.7     | 87.5     | 50.3     | 3.2      | 365.5          | 228.4       |
| 10-1   | 10                       | 23.9     | 86.9     | 47.6     | 2.9      | 505.8          | 348.8       |
| 10-2   | 10                       | –        | 87.8     | 52.2     | 2.6      | 515.1          | 396.2       |
| 10-3   | 10                       | 24.4     | 87.6     | 49.5     | 3.1      | 574.9          | 370.9       |

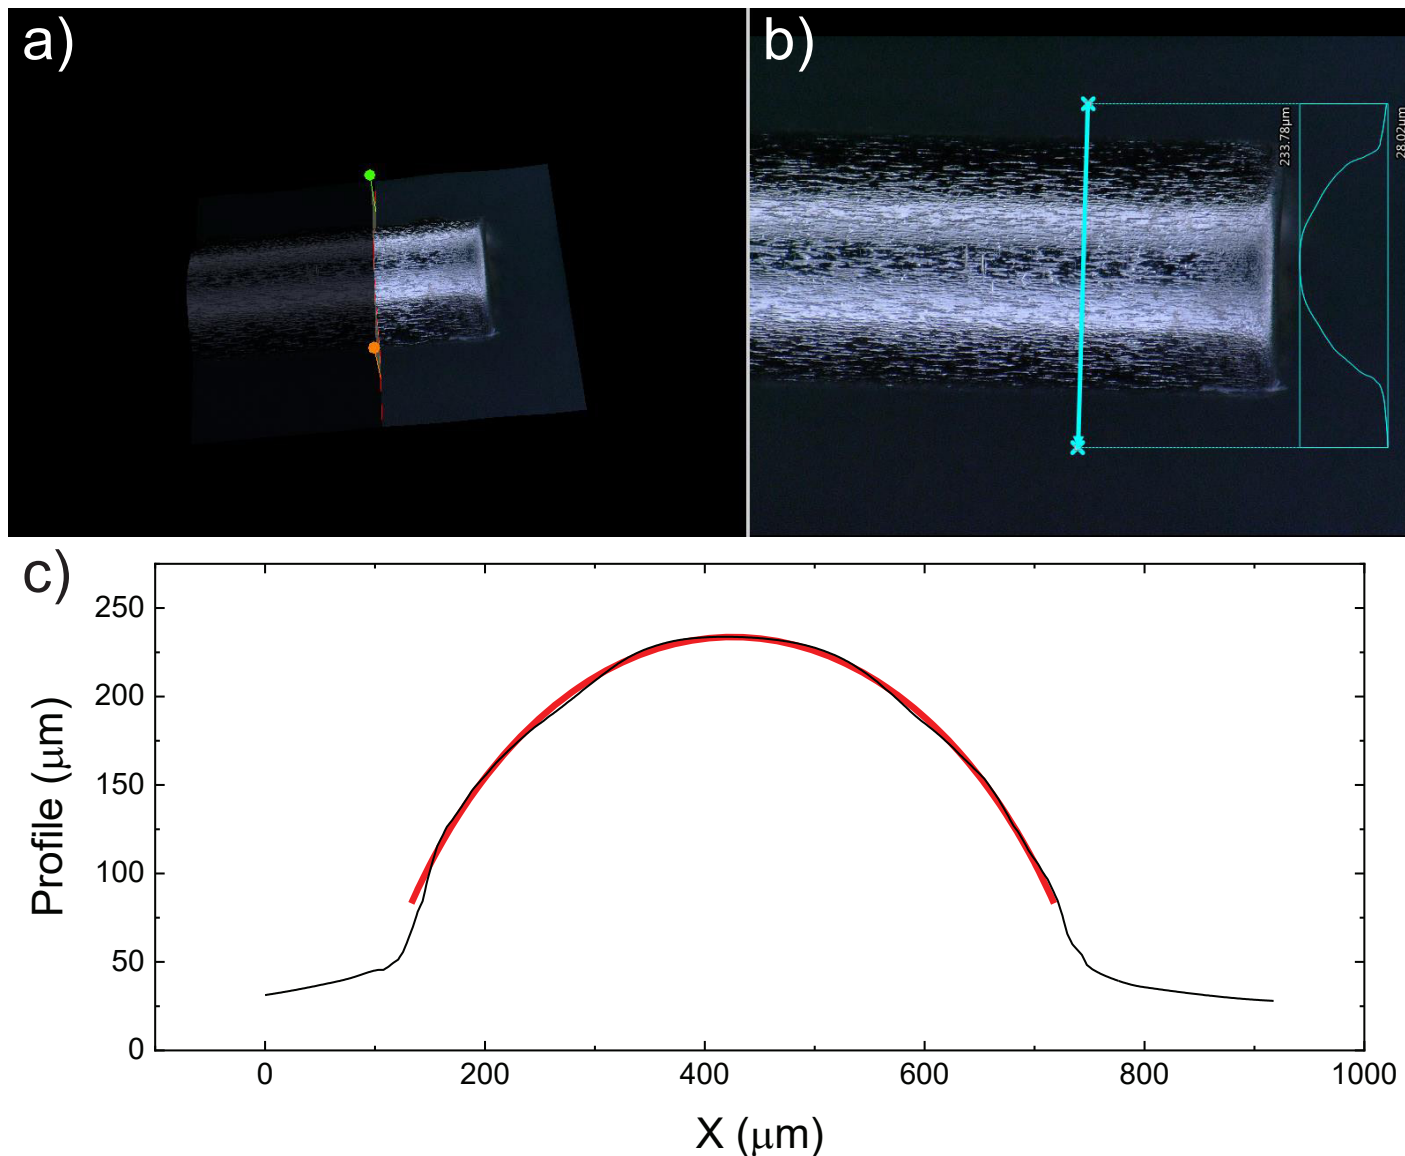

**Fig. S13** Surface scan and line profile of the walls of the needle used in this study. Fitting this curvature shows that the needle radius is  $a = 359.3 \pm 0.7 \mu\text{m}$  (red fit).

#### 2.4 Needle Tip Profile

Profiles of the needle walls and corner at the needle tip were gathered on a Keyence VHS-5000 Microscope. A profile of the needle wall is contained in Figure S13. The surface images in Figure S13a-b show that the needle walls have a particular texture. The needle was used as received and so this texture must develop during the manufacturing process. A circular fit to the profile in Figure S13c estimated the outer needle radius as  $a = 359.3 \pm 0.7 \mu\text{m}$  which is rounded to 0.359 mm in the main text. A profile of the corner at the needle tip is shown in Figure S14. Fits to this profile suggest that the outside corner of the needle has a radius of  $80.5 \pm 1.1 \mu\text{m}$  and the inside corner has a radius of  $55.7 \pm 0.4 \mu\text{m}$ .

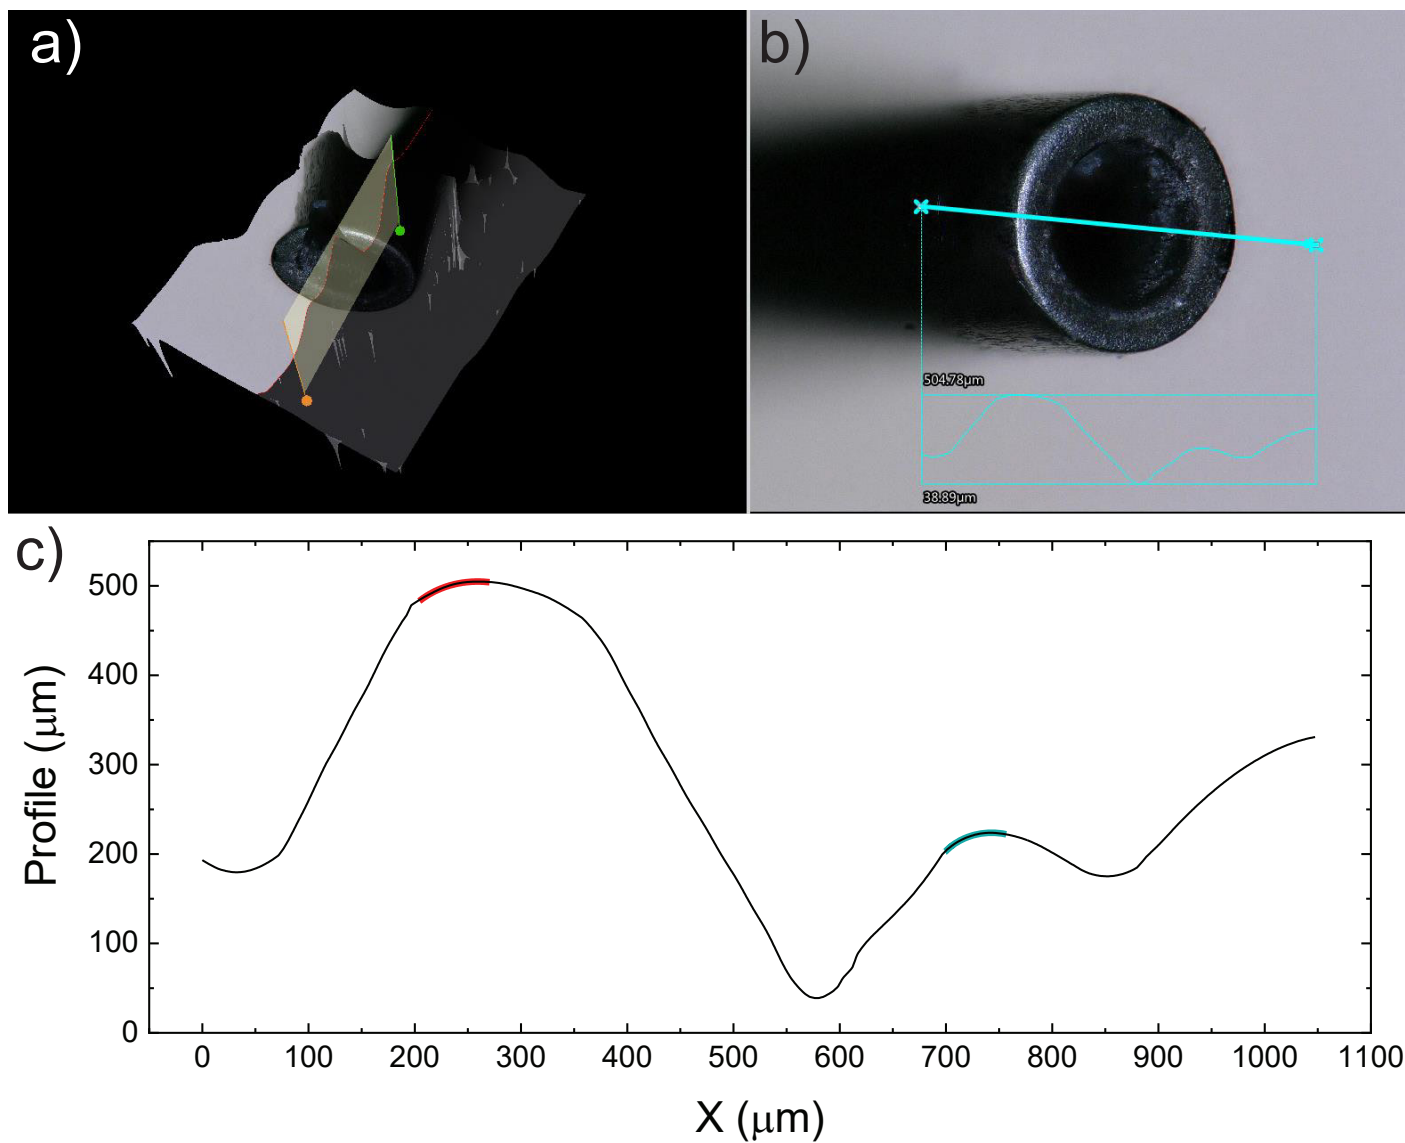

**Fig. S14** Surface scan and line profile of the corner at the needle tip. Fits to the profile assuming a circular geometry suggest that the outer corner profile has a radius of  $80.5 \pm 1.1 \mu\text{m}$  (red fit) while the inner corner profile has a radius of  $55.7 \pm 0.4 \mu\text{m}$  (blue green fit).

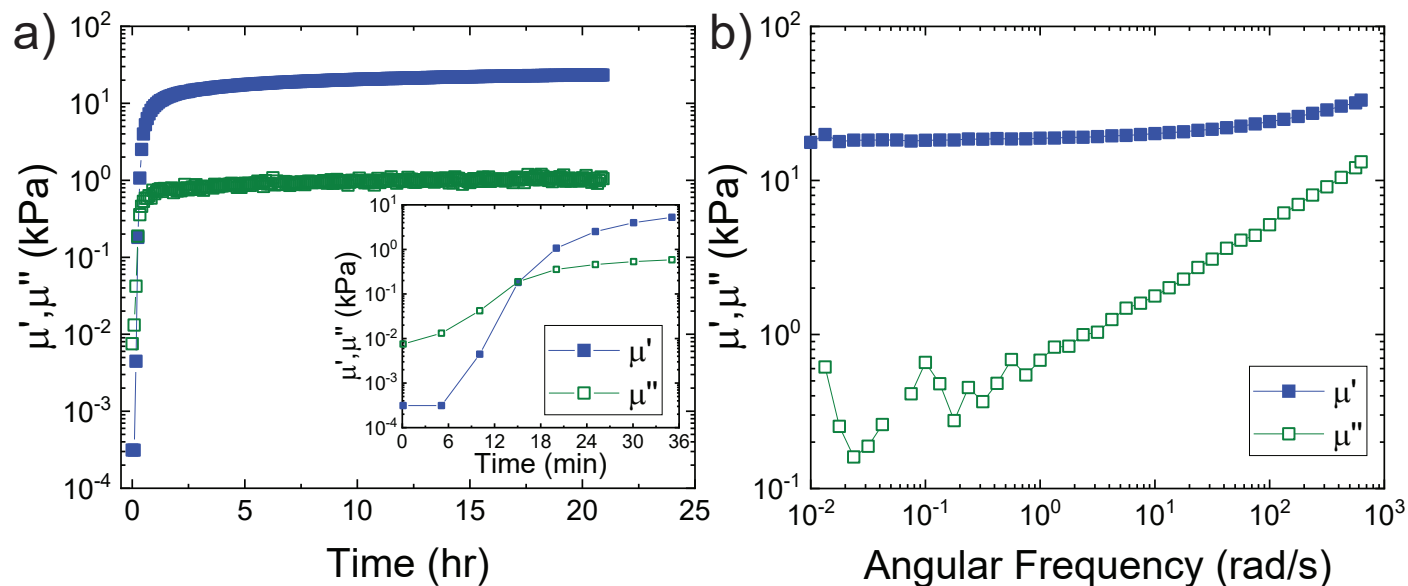

**Fig. S15** a) Plot of the storage and loss moduli vs time spent at 70°C during curing of the material. b) Frequency sweep of the same sample after equilibrating at 25°C for 2 hours.

## 2.5 Rheometry

Oscillatory measurements to monitor curing and quantify the rheological response of the blend used in this study was performed on a TA Instruments AR-G2 stress-controlled rheometer with a 40 mm steel parallel plate geometry with a gap of 400  $\mu\text{m}$ . Uncured material was loaded into the rheometer at room temperature. The temperature was then increased to 70°C and held at this temperature while the curing was monitored by measuring the moduli at a frequency of 10 rad/s and strain amplitude of 0.1% every 5 minutes for 21 hours. After 21 hours, the sample was equilibrated to 25°C for 2 hours. Finally, a frequency sweep was performed from 0.01 rad/s to 628.319 rad/s with an amplitude of 0.1% strain.

A plot of the shear storage  $\mu'$  and loss  $\mu''$  moduli during the curing process is shown in Figure S15a. The gel point, defined as the point at which  $\mu' = \mu''$ , occurs at approximately 15 minutes as seen in the inset. The material continues to cure before the  $\mu'$  and  $\mu''$  appear to level off at long cure times as the catalyst diffuses about the system and crosslinks the reactants together to form network junctions. This suggests that the 21 hours that the material cures at high temperature gives sufficient time for the curing reaction to proceed to the point that, even though the catalyst remains active at room temperature, we would not expect to observe a significant increase in the stiffness of the material due to the formation of further network junctions at room temperature. A plot of  $\mu'$  and  $\mu''$  against frequency is contained in Figure S15b. This plot shows that the  $\mu'$  that develops is fairly independent of frequency and slightly increases at frequencies above 10 rad/s.  $E$  is estimated from the average of  $3\mu'$  up to 10 rad/s as  $58.1 \pm 4.3$  kPa. In this frequency range  $\mu' \gg \mu''$ .



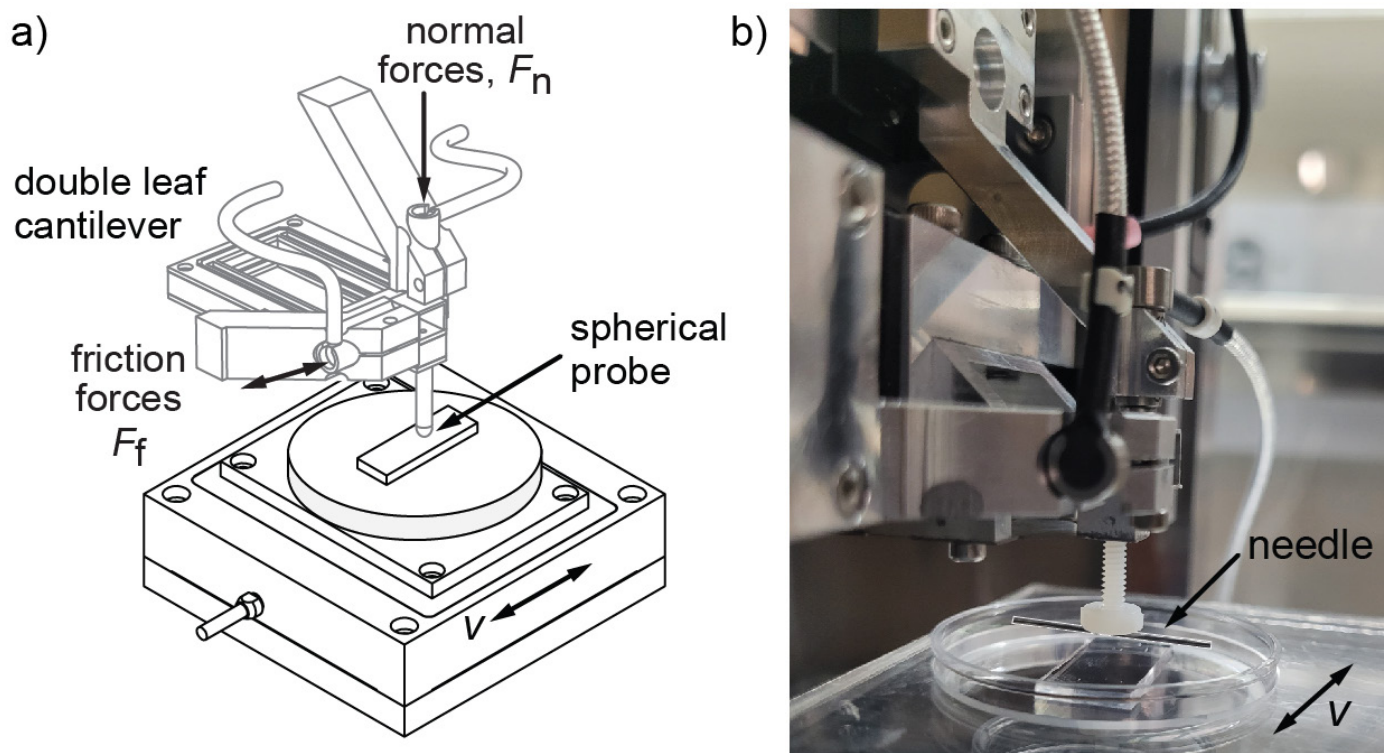

**Fig. S16** a) Schematic and b) image of the linear reciprocating tribometer<sup>10</sup> employed in this work to measure sliding friction. The needle is perpendicular to the direction of reciprocation.

## 2.6 Sliding Friction Measurements

Sliding experiments were conducted with a custom-built linear reciprocating tribometer, as shown in Figure S16. A chrome steel spherical probe (radius of curvature,  $a = 2.38$  mm) and a 22 gauge blunt-tipped steel needle (outer radius,  $a = 0.355$  mm measured via calipers) were mounted to a double-leaf cantilever with normal and tangential spring constants of  $180 \mu\text{N}/\mu\text{m}$  and  $525 \mu\text{N}/\mu\text{m}$ , respectively. The needle was attached horizontally to the cantilever such that the long axis was perpendicular to the sliding direction (Figure S16b). Silicone samples (10 mm wide) were placed on a motorized stage (Physik Instrumente, L-509.20DG10, 52 mm travel range), and the friction coefficient

was measured at four different sliding speeds ( $v = 0.1, 0.5, 1, 2$  mm/s). With the spherical probe, three normal forces ( $F_n = 0.5, 1, 2.5$  mN) were applied for a sliding path,  $l$ , (1/2 cycle) of 3 or 4 mm, depending on the normal force. The sliding paths were chosen to ensure that the sliding distance in one direction was at least eight times the estimated Hertzian contact area radius at maximum normal load. For the steel needle, a cylinder-on-flat geometry was used to estimate the rectangular contact area and applied pressure across five normal forces ( $F_n = 0.5, 1, 2.5, 3.1,$  and  $5$  mN) along  $l = 3$  mm. The estimated maximum contact pressures at the center of contact for both probe geometries can be found in Table S5 and were calculated using Equation (S21) and Equation (S22).<sup>11</sup>

**Table S5** Summary of the estimated maximum contact pressures at the center of contact for the two different probe geometries.

| Probe geometry  | $a$ (mm) | Force (mN) | Estimated contact pressure (kPa) |
|-----------------|----------|------------|----------------------------------|
| Spherical probe | 2.38     | 0.5        | 4.58                             |
|                 |          | 1          | 5.77                             |
|                 |          | 2.5        | 7.83                             |
| Needle          | 0.355    | 0.5        | 1.83                             |
|                 |          | 1          | 2.59                             |
|                 |          | 2.5        | 4.10                             |
|                 |          | 3.1        | 4.57                             |
|                 |          | 5          | 5.80                             |

$$P_{\text{sphere}} = \frac{1}{\pi} \left( \frac{6FE^*2}{a^2} \right)^{\frac{1}{3}} \quad (\text{S21})$$

$$P_{\text{cylinder}} = \left( \frac{FE^*}{\pi La} \right)^{\frac{1}{2}} \quad (\text{S22})$$

Friction coefficients were calculated by averaging the normal and friction forces within the middle 25% of the sliding path, as depicted in Figure S17 with a representative friction force loop. The following equation (Equation (S23)) was used to calculate the average friction coefficient for each cycle,  $f_{\text{cycle}}$ , where  $F_{f,\text{forward}}$  is the average friction force in the forward direction and  $F_{f,\text{reverse}}$  is the average friction force in the reverse direction. The reported friction coefficients and standard deviations for each normal load were determined by averaging  $f_{\text{cycle}}$  over 100 cycles to obtain  $f$ .

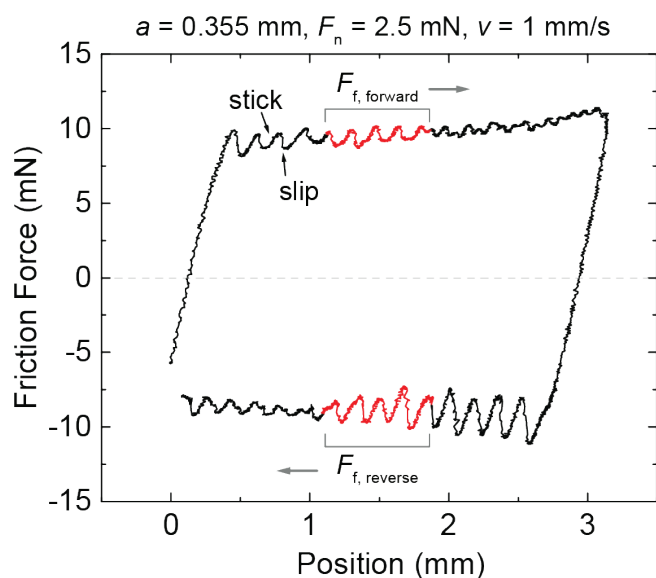

**Fig. S17** Representative friction force loop for the needle at an applied normal force of 2.5 mN and a velocity of 1 mm/s. The middle 25% of the friction force in both the forward and reverse direction (denoted by brackets and highlighted in red) is used to calculate the friction coefficient. Note that the peaks and valleys that are present in the free-sliding region indicate that stick-slip is occurring during sliding.

$$f_{\text{cycle}} = \frac{\langle F_{f,\text{forward}} \rangle - \langle F_{f,\text{reverse}} \rangle}{2 \langle F_n \rangle} \quad (\text{S23})$$

Friction coefficients as a function of applied normal force and maximum contact pressure for the spherical probe and needle are displayed in Figure S18. The friction coefficient,  $f$ , decreases with increasing normal load and pressure and generally increases with increasing sliding velocity. Stick-slip also increases with increasing velocity (Figure S19).



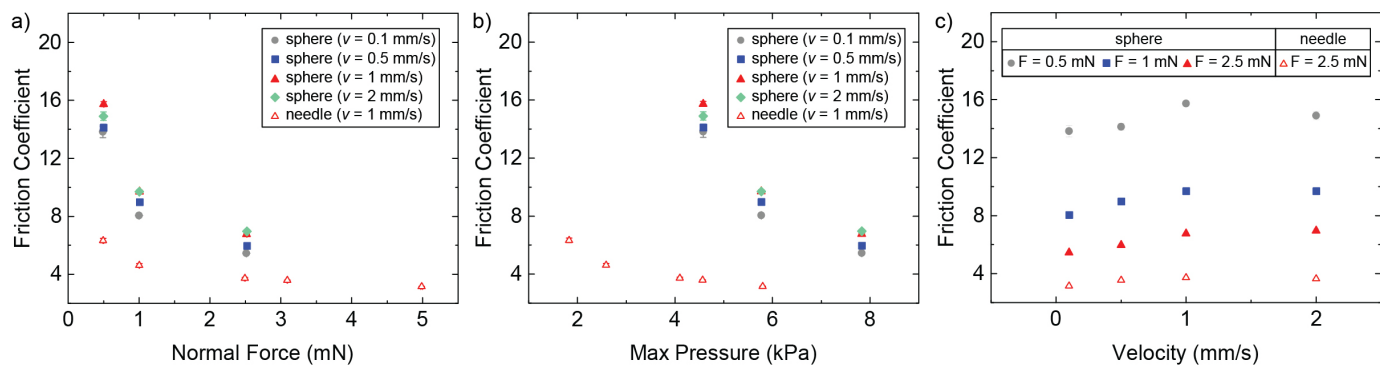

**Fig. S18** Plots of the friction coefficient against a) normal force, b) max contact pressure at the center of contact, and c) sliding velocity. These measurements show that the friction coefficient decreases with increasing normal force and max pressure. The friction coefficient appears to increase slightly with sliding velocity, but more rigorous studies need to be conducted to make any conclusions.

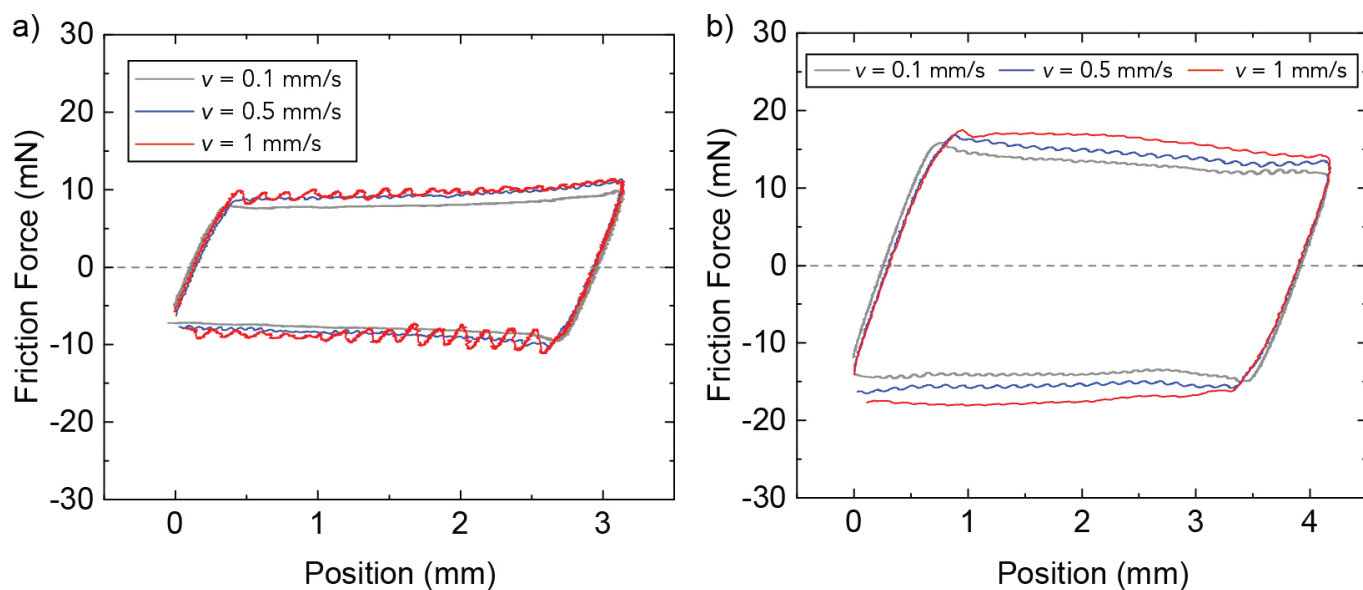

**Fig. S19** Friction force loops for the a) needle and b) sphere probe geometries at various sliding velocities at an applied normal force of 2.5 mN. For the needle probe, as the sliding speed increased, the stick-slip behavior increased.

**Table S6** Summary of the friction coefficient measurements performed in this work.

| Probe               | $a$ (mm) | Velocity (mm/s) | $F_n$ (mN) | $f$             |
|---------------------|----------|-----------------|------------|-----------------|
| Chrome Steel Sphere | 2.38     | 0.1             | 0.5        | $13.8 \pm 0.4$  |
| Chrome Steel Sphere | 2.38     | 0.5             | 0.5        | $14.1 \pm 0.2$  |
| Chrome Steel Sphere | 2.38     | 1               | 0.5        | $15.7 \pm 0.2$  |
| Chrome Steel Sphere | 2.38     | 2               | 0.5        | $14.9 \pm 0.3$  |
| Chrome Steel Sphere | 2.38     | 0.1             | 1          | $8.05 \pm 0.07$ |
| Chrome Steel Sphere | 2.38     | 0.5             | 1          | $8.99 \pm 0.06$ |
| Chrome Steel Sphere | 2.38     | 1               | 1          | $9.70 \pm 0.09$ |
| Chrome Steel Sphere | 2.38     | 2               | 1          | $9.71 \pm 0.11$ |
| Chrome Steel Sphere | 2.38     | 0.1             | 2.5        | $5.44 \pm 0.06$ |
| Chrome Steel Sphere | 2.38     | 0.5             | 2.5        | $5.98 \pm 0.03$ |
| Chrome Steel Sphere | 2.38     | 1               | 2.5        | $6.77 \pm 0.05$ |
| Chrome Steel Sphere | 2.38     | 2               | 2.5        | $6.97 \pm 0.10$ |
| Steel Needle        | 0.359    | 1               | 0.5        | $6.33 \pm 0.15$ |
| Steel Needle        | 0.359    | 1               | 1          | $4.62 \pm 0.12$ |
| Steel Needle        | 0.359    | 0.1             | 2.5        | $3.16 \pm 0.02$ |
| Steel Needle        | 0.359    | 0.5             | 2.5        | $3.54 \pm 0.02$ |
| Steel Needle        | 0.359    | 1               | 2.5        | $3.73 \pm 0.06$ |
| Steel Needle        | 0.359    | 2               | 2.5        | $3.65 \pm 0.05$ |
| Steel Needle        | 0.359    | 1               | 3.1        | $3.58 \pm 0.03$ |
| Steel Needle        | 0.359    | 1               | 5          | $3.15 \pm 0.02$ |

## References

- 1 K. R. Shull, D. Ahn, W.-L. Chen, C. M. Flanigan and A. J. Crosby, *Macromolecular Chemistry and Physics*, 1998, **199**, 489–511.
- 2 C. W. Barney, M. E. Helgeson and M. T. Valentine, *Extreme Mechanics Letters*, 2022, **52**, 101616.
- 3 R. S. Rivlin and D. W. Saunders, *Philosophical Transactions of the Royal Society A: Mathematical, Physical and Engineering Sciences*, 1951, **243**, 251–288.
- 4 M. Destrade, G. Saccomandi and I. Sgura, *Proceedings of the Royal Society A*, 2017, **473**, 20160811.
- 5 *Abaqus*.
- 6 G. A. Holzapfel, *Nonlinear Solid Mechanics: A Continuum Approach for Engineering*, 2000.
- 7 A. Kossa and S. Berezvai, *Polymer Testing*, 2016, **53**, 149–155.
- 8 S. Berezvai, *Constitutive modelling of compressible solids including viscoelastic/viscoplastic effects*, 2020.
- 9 G. J. Lake, *Rubber Chemistry and Technology*, 1995, **68**, 435–460.
- 10 J. M. Urueña, S. M. Hart, D. L. Hood, E. O. McGhee, S. R. Niemi, K. D. Schulze, P. P. Levings, W. G. Sawyer and A. A. Pitenis, *Tribology Letters*, 2018, **66**, 1–7.
- 11 K. L. Johnson, *Contact Mechanics*, Cambridge University Press, 1985.
